# Supplementary material
Source: Royal Society of Chemistry journal article supplement (doi:10.1039/d6nr01093h)
Supplement: d6nr01093h1.pdf [file d6nr01093h1.pdf]

## Supporting information

### Supporting Tables

**Table S1** Properties of NiFe<sub>2</sub>O<sub>4</sub> nanoparticles

| Size (nm) | Purity (%) | Shape     | Color | Density (g/mL) | Molecular Weight |
|-----------|------------|-----------|-------|----------------|------------------|
| 30        | 99         | Spherical | Brown | 5.368          | 234.38           |

**Table S2** Parameters of Experimental Equipment

| Name                        | Model         | Range                   | Supplier                                     |
|-----------------------------|---------------|-------------------------|----------------------------------------------|
| Electronic balance          | FA1004        | 0-100g                  | Supervised by Shanghai Xiniulaibo Instrument |
| UV-Vis spectrophotometer    | UV-5500PC     | 190-1100nm              | Shanghai Yipu Instrument                     |
| Ultrasonic cleaning machine | F-100 S       | /                       | Shenzhen Fuyang Technology Group             |
| Xenon light source system   | CEL-PE300L-3A | 0-20000w/m <sup>2</sup> | Beijing Zhongjiao Jinyuan                    |
| Thermocouple thermometer    | TCMU8-K15     | -200~1360°C             | Guangdong Dajia Sensing                      |
| Gaussmeter                  | NK-5          | 0-2400mT                | Tianjin Liaowang Photoelectric               |

**Table S3** Comparison of photothermal conversion efficiency of different magnetic materials

| Sample                                   | concentration | Photothermal conversion efficiency |
|------------------------------------------|---------------|------------------------------------|
| NiFe <sub>2</sub> O <sub>4</sub>         | 200ppm        | 66.96%                             |
|                                          | 250ppm        | 74.19%                             |
|                                          | 300ppm        | 71.15%                             |
| Fe <sub>3</sub> O <sub>4</sub>           | 0.2wt%        | 58%                                |
| Fe <sub>3</sub> O <sub>4</sub> /graphene | 200ppm        | 58.21%                             |
| Fe <sub>3</sub> O <sub>4</sub> @C        | 0.02wt%       | 48.69%                             |

## Supplementary Figures

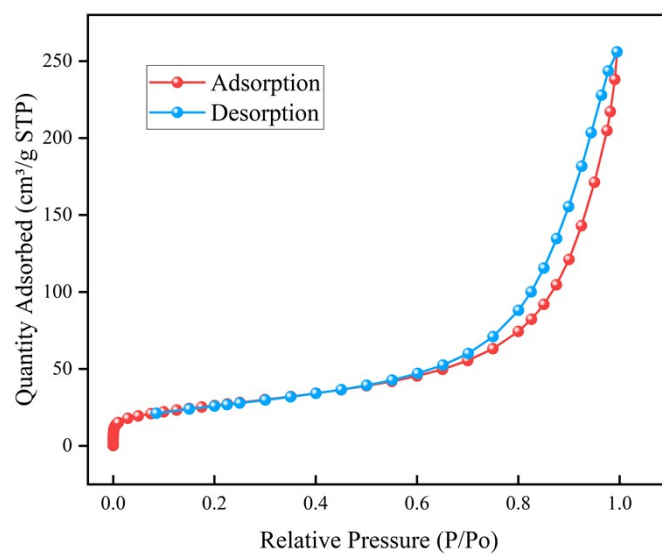

**Fig.S1.** BET characterization of NiFe<sub>2</sub>O<sub>4</sub> nanoparticles
